# Supplementary material for: A Series of Lanthanide Complexes with Keggin-Type Monolacunary Phosphotungstate: Synthesis and Structural Characterization
Source: MDPI journal article supplement (doi:10.3390/inorganics11080327), 2023-08-01
Supplement: s1 [file s1]

## Supporting Information

### **A series of lanthanide complexes with Keggin-type monolacunary phosphotungstate: synthesis and structural characterization**

**Vladimir S. Korenev<sup>\*</sup>, Taisiya S. Sukhikh, Maxim N. Sokolov**

Nikolaev Institute of Inorganic Chemistry, Siberian Branch of Russian Academy of Sciences, Lavrentieva St. 3, 630090 Novosibirsk, Russia

\* Correspondence: [wkorenev@niic.nsc.ru](mailto:wkorenev@niic.nsc.ru)

## **Content**

|                                                       |          |
|-------------------------------------------------------|----------|
| <b>1. IR spectroscopy .....</b>                       | <b>2</b> |
| <b>2. Crystal data and structure refinement .....</b> | <b>3</b> |

## 1. IR spectroscopy

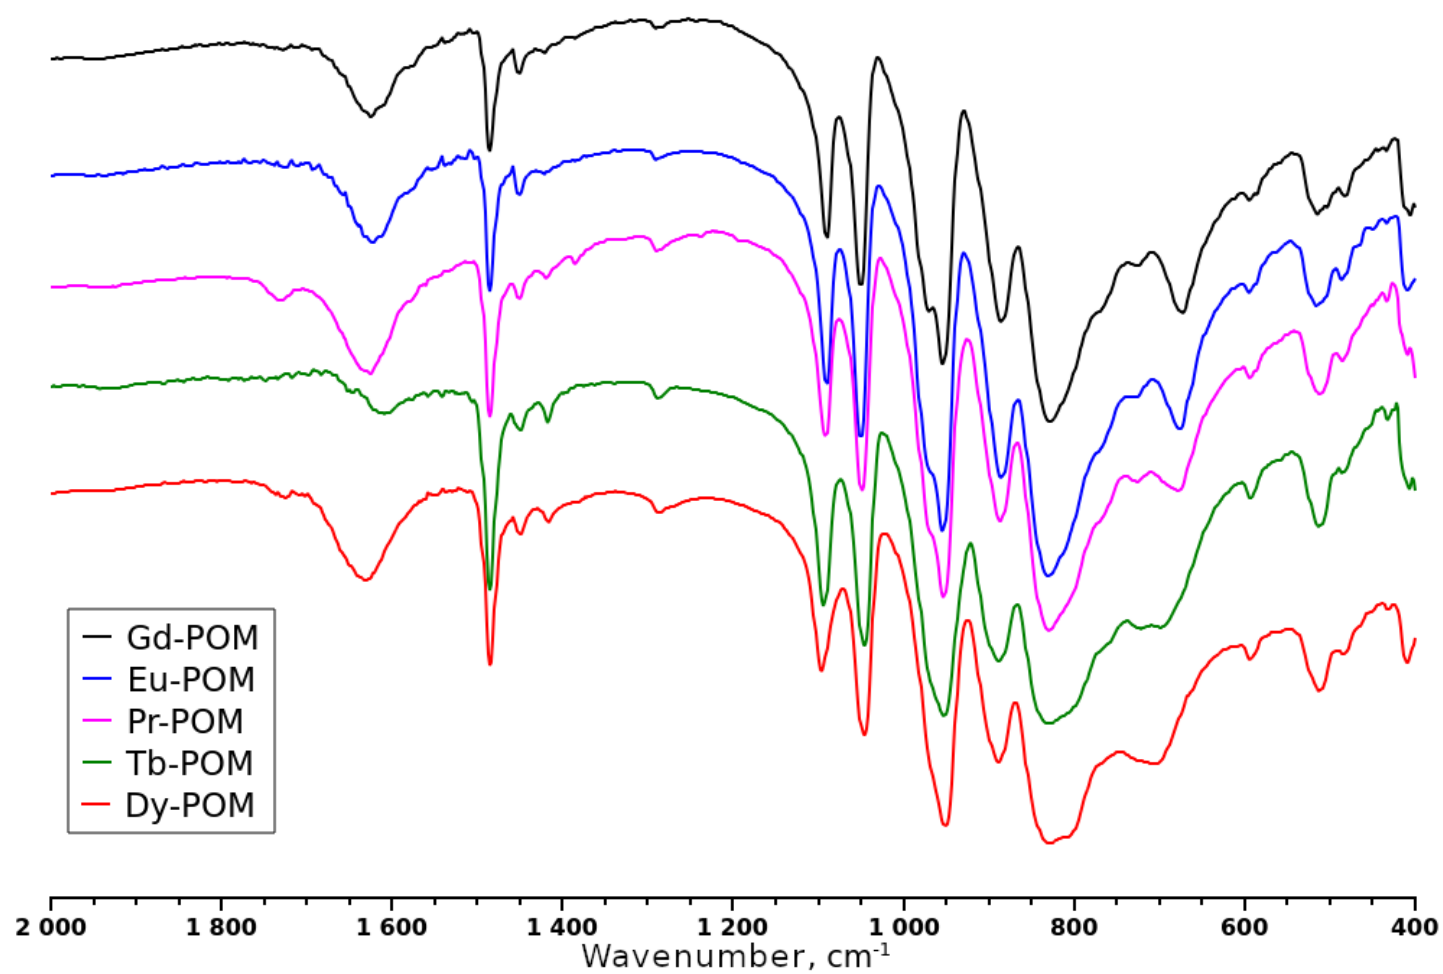

**Figure S1.** IR spectra of  $\text{Cat}_4\text{Ln}(\text{PW}_{11}\text{O}_{39}) \cdot x\text{H}_2\text{O}$  complexes (Ln from the top to the bottom): Gd, Eu, Pr, Tb and Dy.

## 2. Crystal data and structure refinement

**Table S1.** Crystal data and structure refinement for **1–3Gd**

| Identification code                                          | <b>1Gd</b>                                                                                      | <b>2Gd</b>                                                                                                                    | <b>3Gd</b>                                                                                                                                 |
|--------------------------------------------------------------|-------------------------------------------------------------------------------------------------|-------------------------------------------------------------------------------------------------------------------------------|--------------------------------------------------------------------------------------------------------------------------------------------|
| Empirical formula                                            | C <sub>8</sub> H <sub>32</sub> GdK <sub>2</sub> N <sub>2</sub> O <sub>46</sub> PW <sub>11</sub> | C <sub>24</sub> H <sub>72</sub> Gd <sub>2</sub> K <sub>2</sub> N <sub>6</sub> O <sub>104</sub> P <sub>2</sub> W <sub>22</sub> | C <sub>27.7</sub> H <sub>83.09</sub> Gd <sub>2</sub> K <sub>1.07</sub> N <sub>6.92</sub> O <sub>96.15</sub> P <sub>2</sub> W <sub>22</sub> |
| Formula weight                                               | 3181.12                                                                                         | 6648.21                                                                                                                       | 6539.25                                                                                                                                    |
| Temperature/K                                                | 150(2)                                                                                          | 150(2)                                                                                                                        | 150(2)                                                                                                                                     |
| Space group                                                  | <i>P</i> –1                                                                                     | <i>P</i> –1                                                                                                                   | <i>P</i> 2 <sub>1</sub> / <i>c</i>                                                                                                         |
| <i>a</i> /Å                                                  | 11.7135(17)                                                                                     | 12.7931(18)                                                                                                                   | 12.9425(9)                                                                                                                                 |
| <i>b</i> /Å                                                  | 11.9150(18)                                                                                     | 13.0106(18)                                                                                                                   | 22.1257(14)                                                                                                                                |
| <i>c</i> /Å                                                  | 19.417(3)                                                                                       | 23.291(4)                                                                                                                     | 20.5429(14)                                                                                                                                |
| $\alpha$ /°                                                  | 95.738(6)                                                                                       | 73.941(4)                                                                                                                     | 90                                                                                                                                         |
| $\beta$ /°                                                   | 92.399(6)                                                                                       | 80.599(6)                                                                                                                     | 99.701(2)                                                                                                                                  |
| $\gamma$ /°                                                  | 117.621(6)                                                                                      | 61.754(4)                                                                                                                     | 90                                                                                                                                         |
| Volume/Å <sup>3</sup>                                        | 2377.1(7)                                                                                       | 3279.4(8)                                                                                                                     | 5798.6(7)                                                                                                                                  |
| <i>Z</i>                                                     | 2                                                                                               | 1                                                                                                                             | 2                                                                                                                                          |
| $\rho_{\text{calc}}$ /cm <sup>3</sup>                        | 4.444                                                                                           | 3.346                                                                                                                         | 3.731                                                                                                                                      |
| $\mu$ /mm <sup>–1</sup>                                      | 28.190                                                                                          | 20.386                                                                                                                        | 23.019                                                                                                                                     |
| <i>F</i> (000)                                               | 2786.0                                                                                          | 2914.0                                                                                                                        | 5747.0                                                                                                                                     |
| Crystal size/mm <sup>3</sup>                                 | 0.06 × 0.05 × 0.01                                                                              | 0.15 × 0.1 × 0.06                                                                                                             | 0.1 × 0.09 × 0.05                                                                                                                          |
| Radiation                                                    | MoK $\alpha$ ( $\lambda$ = 0.71073)                                                             | MoK $\alpha$ ( $\lambda$ = 0.71073)                                                                                           | MoK $\alpha$ ( $\lambda$ = 0.71073)                                                                                                        |
| 2 $\theta$ range for data collection/°                       | 4.032 to 48.814                                                                                 | 3.642 to 56.546                                                                                                               | 3.192 to 54.706                                                                                                                            |
| Index ranges                                                 | –13 ≤ <i>h</i> ≤ 13, –13 ≤ <i>k</i> ≤ 13, –22 ≤ <i>l</i> ≤ 22                                   | –16 ≤ <i>h</i> ≤ 16, –17 ≤ <i>k</i> ≤ 17, –30 ≤ <i>l</i> ≤ 30                                                                 | –16 ≤ <i>h</i> ≤ 15, –28 ≤ <i>k</i> ≤ 28, –26 ≤ <i>l</i> ≤ 26                                                                              |
| Reflections collected                                        | 12845                                                                                           | 28316                                                                                                                         | 68148                                                                                                                                      |
| Independent reflections                                      | 12845 [ <i>R</i> <sub>int</sub> = 0.0869, <i>R</i> <sub>sigma</sub> = 0.1094]                   | 28316 [ <i>R</i> <sub>int</sub> = 0.0860, <i>R</i> <sub>sigma</sub> = 0.0849]                                                 | 12879 [ <i>R</i> <sub>int</sub> = 0.0539, <i>R</i> <sub>sigma</sub> = 0.0422]                                                              |
| Data/restraints/parameters                                   | 12845/111/581                                                                                   | 28316/888/637                                                                                                                 | 12879/888/614                                                                                                                              |
| Goodness-of-fit on <i>F</i> <sup>2</sup>                     | 1.032                                                                                           | 1.172                                                                                                                         | 1.197                                                                                                                                      |
| Final <i>R</i> indexes [ <i>I</i> ≥ 2 $\sigma$ ( <i>I</i> )] | <i>R</i> <sub>1</sub> = 0.0644, <i>wR</i> <sub>2</sub> = 0.1526                                 | <i>R</i> <sub>1</sub> = 0.1085, <i>wR</i> <sub>2</sub> = 0.2447                                                               | <i>R</i> <sub>1</sub> = 0.0548, <i>wR</i> <sub>2</sub> = 0.1117                                                                            |
| Final <i>R</i> indexes [all data]                            | <i>R</i> <sub>1</sub> = 0.0918, <i>wR</i> <sub>2</sub> = 0.1706                                 | <i>R</i> <sub>1</sub> = 0.1244, <i>wR</i> <sub>2</sub> = 0.2527                                                               | <i>R</i> <sub>1</sub> = 0.0698, <i>wR</i> <sub>2</sub> = 0.1191                                                                            |
| Largest diff. peak/hole / e Å <sup>–3</sup>                  | 4.29/–2.65                                                                                      | 5.20/–5.82                                                                                                                    | 1.95/–2.07                                                                                                                                 |
